# Supplementary material for: An in vivo quantitative Raman-pH sensor of arterial blood based on laser trapping of erythrocytes
Source: Royal Society of Chemistry journal article supplement (doi:10.1039/c5an02315g), 2016-01-01
Supplement: c5an02315g1.pdf [file c5an02315g1.pdf]

## Supporting Information

### *In vivo* quantitative Raman-pH sensor of arterial blood based on laser trapping of erythrocytes

Manman Lin,<sup>a</sup> Bin Xu,<sup>b</sup> Huilu Yao,<sup>\*b</sup> Aiguo Shen<sup>\*a</sup> and Jiming Hu<sup>a</sup>

<sup>a</sup> School of Chemistry and Molecular Sciences, Wuhan University, Wuhan 430072, China. Email: agshen@whu.edu.cn

<sup>b</sup> Laboratory of Biophysics, Guangxi Academy of Sciences, Nanning 530003, China. Email: huiluy@gmail.com

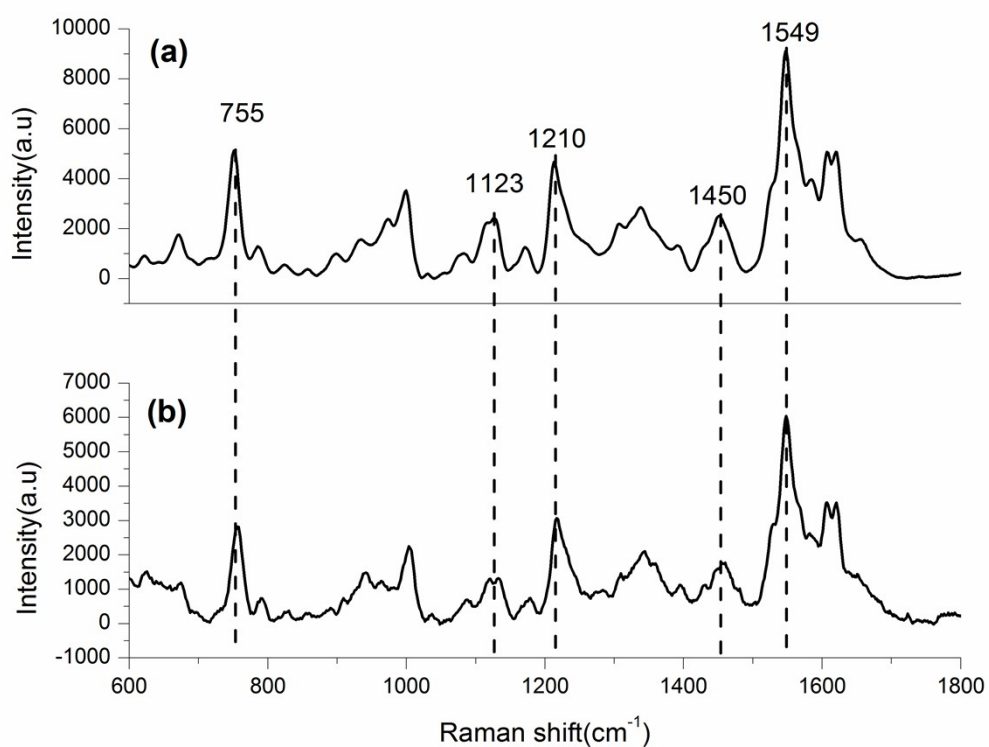

**Fig. S1** (a) Raman spectra of erythrocytes and (b) Raman spectra of hemoglobin excited by a near-infrared laser at 780 nm

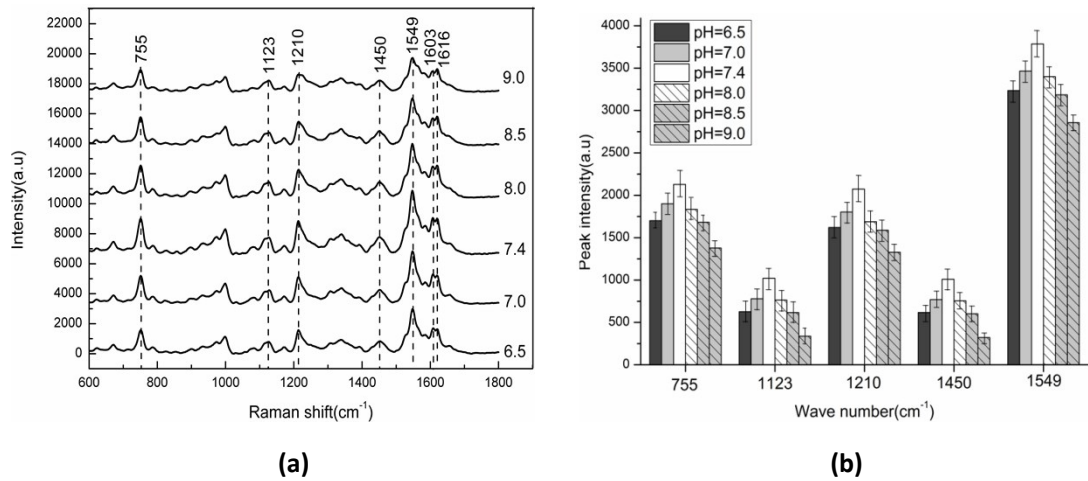

**Fig. S2** (a) Raman spectra and the characteristic peak intensity (b) of hemoglobin under different pH environments

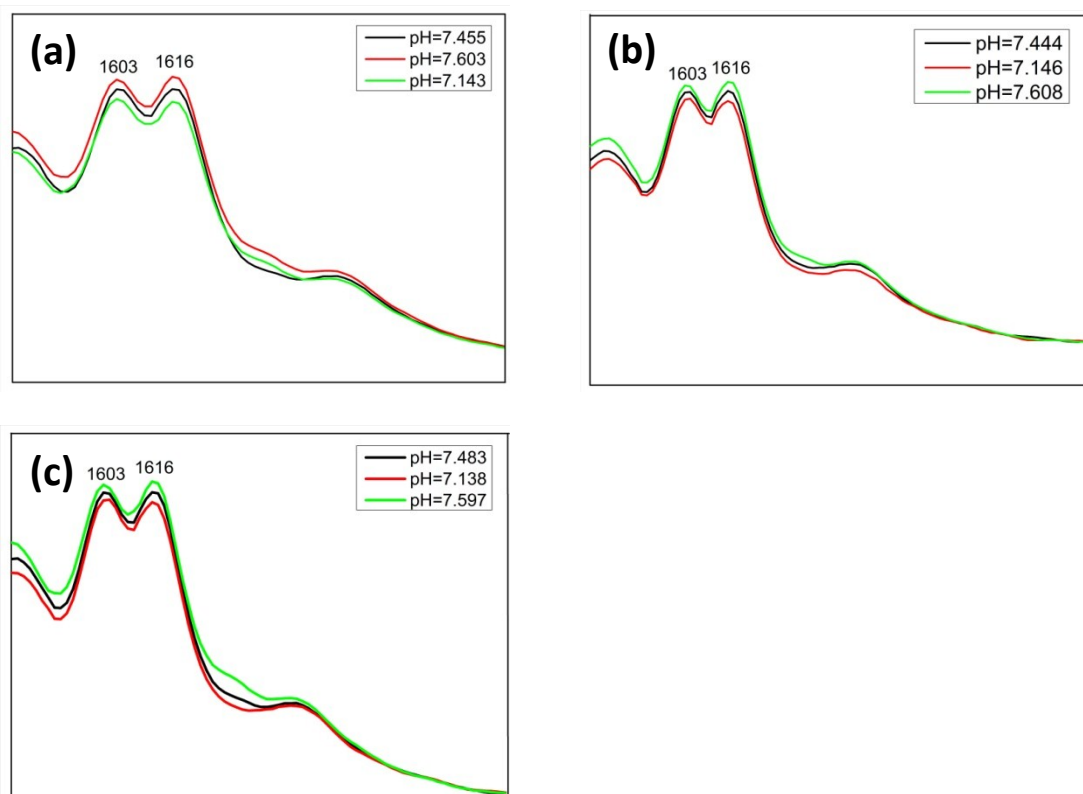

**Fig. S3** The enlarged panels of the characteristic Raman peaks at 1603 and 1616  $\text{cm}^{-1}$  of single erythrocytes under different blood pH conditions (acidosis:  $<7.4$ , alkalosis:  $>7.4$ , and normal:  $\sim 7.4$ ); (a), (b) and (c) represent three replicates, respectively.

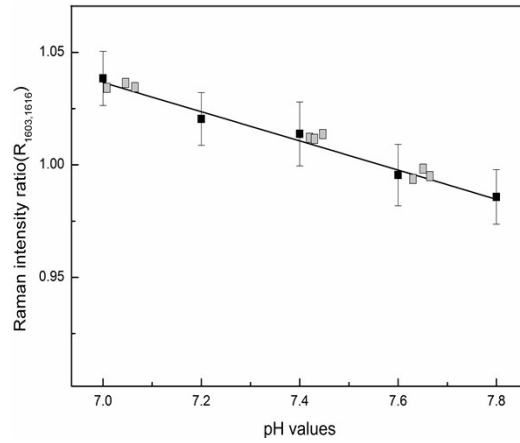

**Fig. S4** The linear graphs plotted by  $R_{1603, 1616}$  with the extracellular pH ranging from 7.0 to 7.8 ( $R^2=0.985$ ) and the distribution of the dots (pH,  $R_{1603, 1616}$ ) (gray) plotted by *in vivo* Raman measurements.

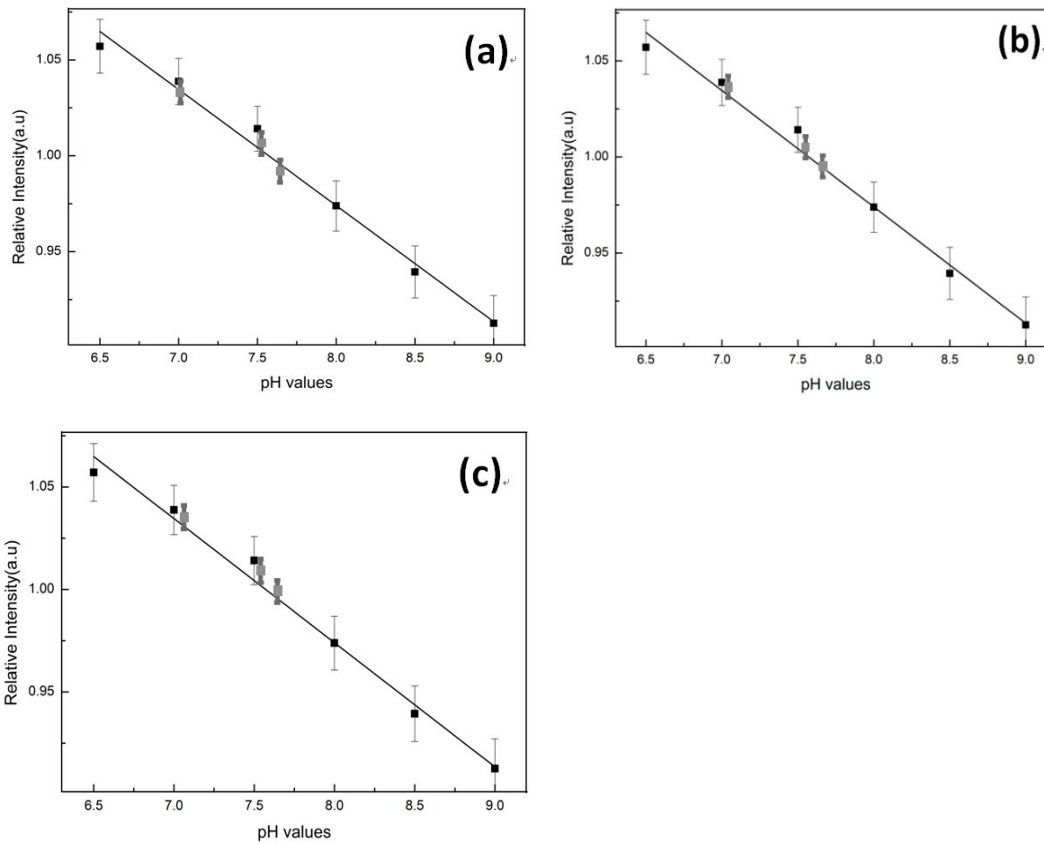

**Fig. S5** The distribution of the dots (pH,  $R_{1603, 1616}$ ) (gray) plotted by *in vivo* Raman measurements under different blood pH on the linear graph (black) plotted by *in vitro* Raman measurements; (a), (b) and (c) represent three replicates, respectively.

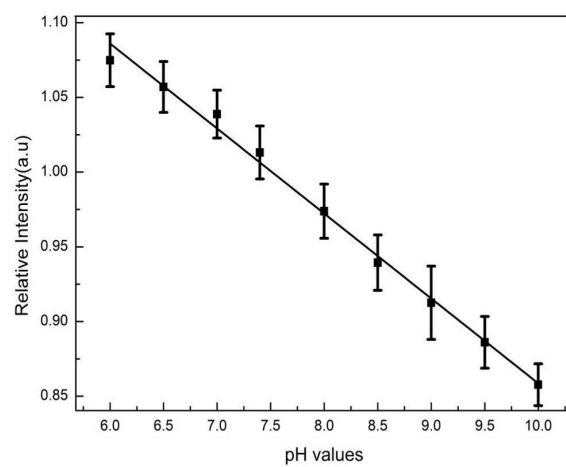

**Fig. S6** The linear graphs plotted by  $R_{1603,1616}$  with the extracellular pH ranging from 6.0 to 10.0
